# Supplementary material for: TRH site-specific methylation in oral and oropharyngeal squamous cell carcinoma
Source: BMC Cancer. 2018 Aug 6;18:786. doi: 10.1186/s12885-018-4706-x (PMC6080527; doi:10.1186/s12885-018-4706-x)
Supplement: Supplementary file 2 — Demographic data and TRH methylation percentage in screening experiments. (XLS 29 kb) [file 12885_2018_4706_MOESM2_ESM.xls]

## Sheet: Sheet1
Additional file 2. Demographic data in screening experiments
	N	Sex (M, F)	Age (Median, Range(y))	Grade (I:II:III:IV)	Stage (I:II:III:IV)	%TRH Methylation (Avg.±S.D.)
Oral rinse from healthy controls
cohort 1	33	17, 16	22, (19-24)	N.A.	N.A.	2.66 ± 0.76
cohort 2	54	25, 29	22, (19-32)	N.A.	N.A.	2.86±0.64
Oral swab from cancer subjects
cohort 1 (oral cancer)	23	15, 8	67, (45-90)	10:5:8:0	0:7:3:13	4.17 ± 0.58
Oral rinse from cancer subjects
cohort 1 (oral cancer)	23	15, 8	67, (45-90)	10:5:8:0	0:7:3:13	3.77 ± 0.60
cohort 2 (oral cancer)	42	19, 23	57, (22-92)	19:12:8:3	10:7:7:18	3.78±0.48
cohort 2 (oropharyngeal cancer)	24	0, 24	57, (29-70)	12:8:2:2	1:6:6:11	3.54±0.37
N.A., Not applicable
